# Supplementary material for: Biotechnological Potential of Cold Adapted Pseudoalteromonas spp. Isolated from ‘Deep Sea’ Sponges
Source: MDPI journal article supplement (doi:10.3390/md15060184), 2017-06-19
Supplement: s1 [file s1]

# Biotechnological potential of cold adapted *Pseudoalteromonas* spp. isolated from 'deep sea' sponges

Erik Borchert<sup>1</sup>, Stephen Knobloch<sup>2</sup>, Emilie Dwyer<sup>1</sup>, Sinéad Flynn<sup>1</sup>, Stephen A. Jackson<sup>1</sup>, Ragnar Jóhannsson<sup>2</sup>, Viggó T. Marteinsson<sup>2</sup>, Fergal O'Gara<sup>1,3,4</sup> and Alan D.W. Dobson<sup>1\*</sup>

## Supplementary figure 1

### Semi-quantitative enzyme activity assays for protease and $\beta$ -galactosidase activity

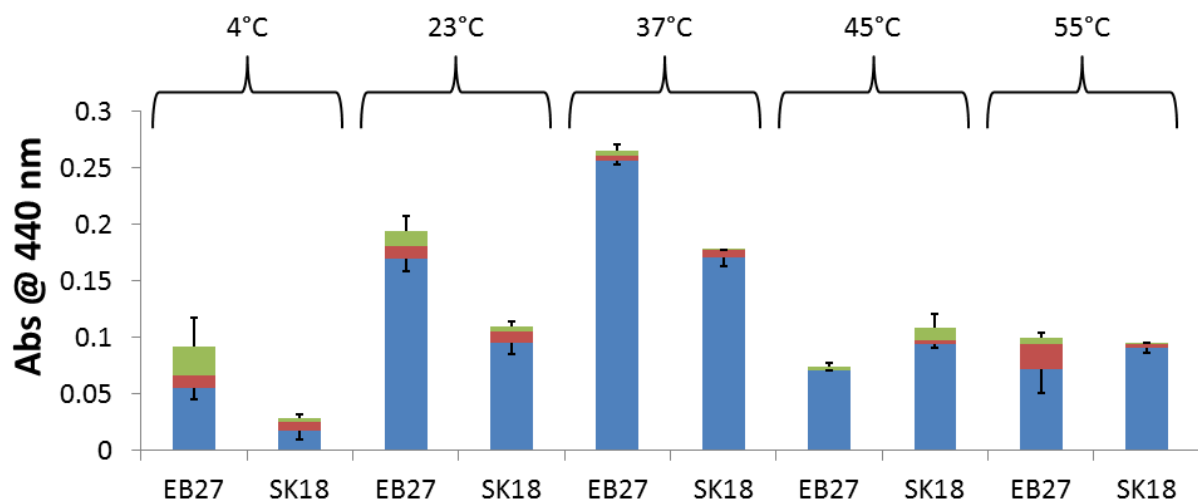

**Figure 1A:** Protease activity assay of the isolates SK18 and EB27 at different temperatures.

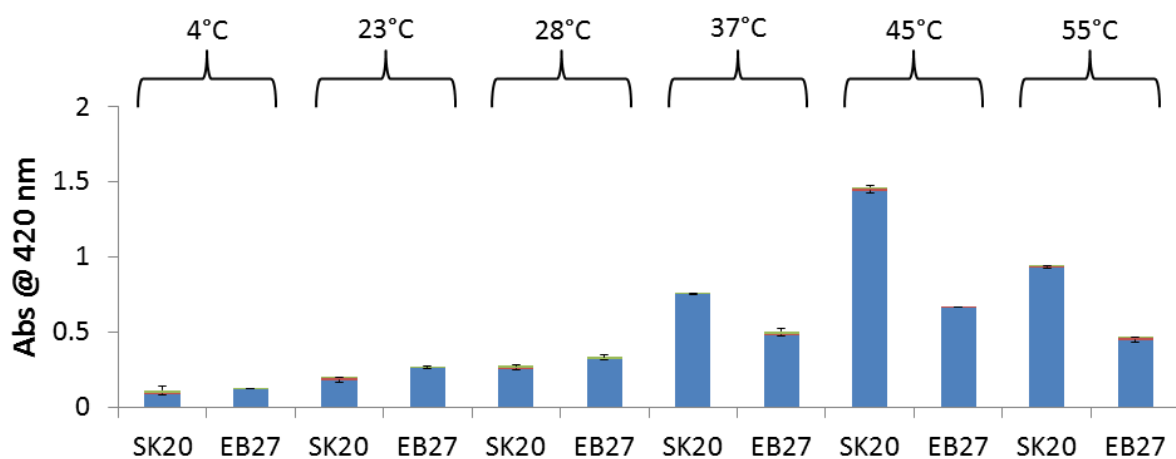

**Figure 1B:**  $\beta$ -galactosidase activity of the isolates SK20 and EB27 at different temperatures.

### Materials and methods:

Native enzyme assays for  $\beta$ -galactosidase and protease activity were carried out with aliquots of overnight cultures from the respective *Pseudoalteromonas* sp. isolates.  $\beta$ -

galactosidase assays were carried out by adding 150  $\mu$ l of overnight culture to 1350  $\mu$ l 0.1 M potassium phosphate buffer solution (pH 8.5, pH 6.0 and 7.0 gave little to no detectable activity) and 22,5  $\mu$ l 0.1 M p-nitrophenyl- $\beta$ -d galactopyranoside as substrate, incubated for 1.5 h at different temperatures and absorbance at 420 nm was measured subsequently. For the protease assay 150  $\mu$ l overnight culture were added to 250  $\mu$ l 2% azocasein solution (0.1 M Tris-HCl, pH 8.0) followed by incubation for 1 h at different temperatures, then 900  $\mu$ l 10% trichloroacetic acid were added and incubated for 15 min at room temperature to stop the reaction and afterwards centrifuged for 10 min at max. speed. 600  $\mu$ l of the supernatant were combined with 700  $\mu$ l 1 M NaOH and the absorbance was measured at 440 nm.

## Supplementary figure 2

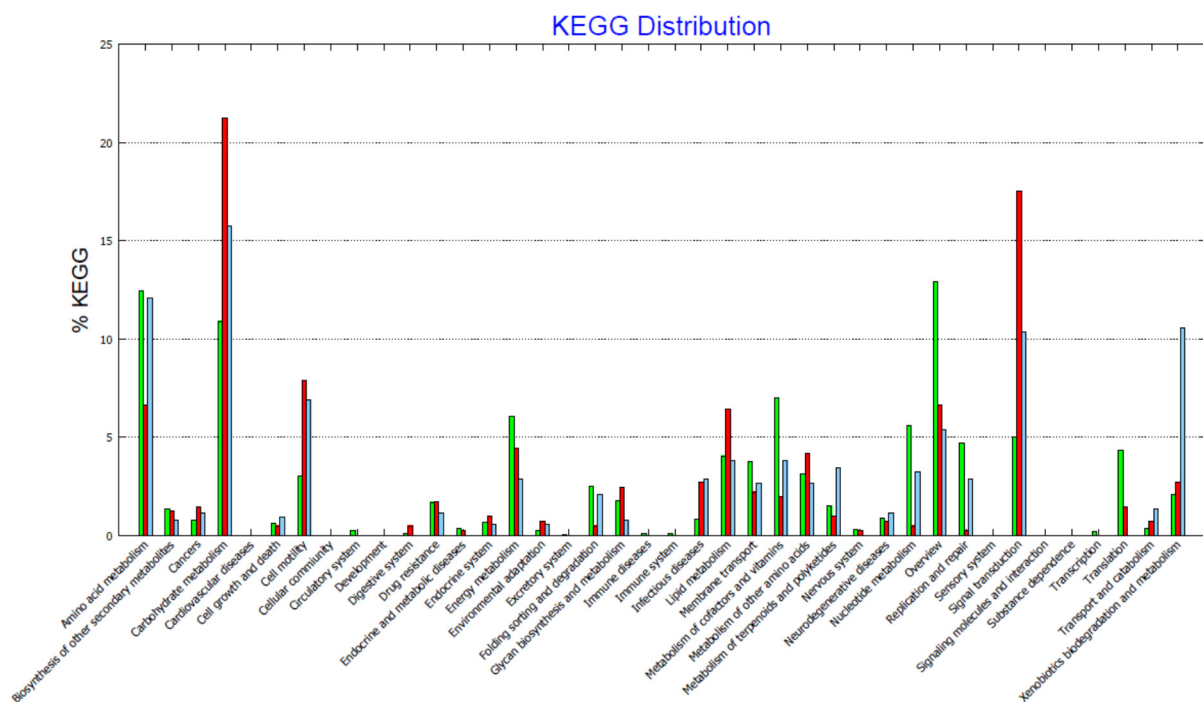

**Figure S2.** KEGG (Kyoto Encyclopedia of Genes and Genomes) functional distribution of the annotated genes. All genes from the five genomes are combined and separated into core, accessory and unique genes.
